# Supplementary material for: Pre-Clinical Tools for Predicting Drug Efficacy in Treatment of Tuberculosis
Source: MDPI journal article supplement (doi:10.3390/microorganisms10030514), 2022-02-26
Supplement: s1 [file s1]

**Table S 2 Abbreviation**

|       |                                                   |
|-------|---------------------------------------------------|
| AMK   | Amikacin                                          |
| AUC   | Area under the curve                              |
| BDQ   | Bedaquiline                                       |
| CM    | Capreomycin                                       |
| CFU   | Colony Forming Unit                               |
| CFZ   | Clofazimine                                       |
| DNA   | Deoxyribonucleic acid                             |
| DS-TB | Drug sensitive TB                                 |
| EGRIN | Environment and Gene Regulatory Influence Network |
| EMB   | Ethambutol                                        |
| EBA   | Early bactericidal activity                       |
| ETH   | Ethionamide                                       |
| FDA   | Food and Drug Authority                           |
| FICI  | Fractional inhibitory concentration index         |
| FUS   | Fusidic Acid                                      |
| GFX   | Gatifloxacin                                      |
| HFIM  | Hollow Fiber infection model                      |
| HIV   | Human Immunodeficiency Virus                      |
| INH   | Isoniazid                                         |
| KM    | Kanamycin                                         |
| LAS   | Lassomycin                                        |

|        |                                                                    |
|--------|--------------------------------------------------------------------|
| LFX    | Levofloxacin                                                       |
| LZD    | Linezolid                                                          |
| MIC    | Minimum inhibitory concentration                                   |
| MXF    | Moxifloxacin                                                       |
| MDR-TB | Multi drug resistant TB                                            |
| NRP    | Non replicating phase                                              |
| PAS    | Para-amino-salicylate-Sodium                                       |
| PA     | Pretomanid                                                         |
| PRISMA | Preferred Reporting Items for Systematic Reviews and Meta-Analyses |
| PROM   | Probabilistic Regulation of Metabolism                             |
| PZA    | Pyrazinamid                                                        |
| REDCA  | Resazurin drugs concentrations assays                              |
| RIF    | Rifampicin                                                         |
| SLD    | Second-line anti-TB drugs                                          |
| STR    | Streptomycin                                                       |
| TRN    | Transcriptional Regulatory Network                                 |
| URSA   | Universal Response Surface Approach                                |
| VAN    | Vancomycin                                                         |
| WHO    | World health Organization                                          |
| XDR-TB | Extensively drug resistant TB                                      |
